# Supplementary material for: Fecal Feline Coronavirus RNA Shedding and Spike Gene Mutations in Cats with Feline Infectious Peritonitis Treated with GS-441524
Source: MDPI journal article supplement (doi:10.3390/v14051069), 2022-05-17
Supplement: s1 [file s1]

## Supplementary

**Table S1.** Nucleotide sequences of the study in FASTA format.

>C2 Feces D143

TGGCATAATGGTTTTACCTGGTGTGTTGGATGCCAATAAAATGGCCATGTATACTGC  
CTCATTAATAGGTGGCATGGCTATGGGTTCCATAACATCCTCTGTAGCTGTTTCCTTTC  
GCCATGCAAGTGCAGGCGAGGCTTAATTAA

>C4 Feces D135

TTGGCATAATGGTTTTACCTGGTGTGTTAGGACGAATAATAAGATGGCCATGTACAC  
TGCCTCTCTWATAGGAGGTATGGCCATGGGCTCTATTACATCTGCTGTAGCAGGTCC  
CTTTTGCTATGCAAGTGCAGGCGAGGCTTAATTAA

>C5 Feces D83

GCATAATGGTTTTACCTGGTGTGTTGACCAAAACAAGATGGCTATGTACACTGCAT  
CTTTAATAGGAGGTATGGCTATGGGCTCTATCACTTCTGCTGTAGCTGTCCCTTTTGC  
CATGCAAGTGCAGGCGAGGCTTAATTA

>C16 Feces D56

CTTGGCATAATGGTTTTACCTGGTGTGTTGGATGACAATAAGATGGCCATGTACACTT  
CCTCTTTAATAGGAGGTATGGCCATGGGCTCTATCACATCCGCTGTAGCTGTTTCCTTT  
CGCCATGCAAGTGCAGGCGAGGCTTAATT

>T2 Feces D0

TGGCATAATGGTTTTACCTGGTGTGTTGGATTCCAATAAAATGGCCATGTATACTGCC  
TCATTAATAGGTGGCATGGCTATGGGTTCCATAACATCCTCTGTAGCTGTTTCCTTTTCG  
CCATGCAAGTGCAGGCGAGGCTTAATTAA

>T2 Feces D1

GGCATAATGGTTTTACCTGGTGTGTTGGATTCCAATAAAATGGCCATGTATACTGCCT  
CATTAAATAGGTGGCATGGCTATGGGTTCCATAACATCCTCTGTAGCTGTTTCCTTTTCGC  
CATGCAAGTGCAGGCGAGGCTTAATTAA

>T3 Effusion D1

GCATAATGGTTTTACCTGGTGTGTTAGACCAAAACAAAATGGCTATGTACACTGGCC  
TCCTTTAATTGGCGGTATGGCTTTGGGCTCTATTACATCTGCTGTAGCTTGTTCCTTTT  
GCCATGCAAGTGCAGGCGAGGCTTAATT

>T4 Effusion D0

GCATAATGGTTTTACCTGGTGTTGTAGACCAAAATAAGATGGCTATGTACACTGCCT  
CTTTAATAGGAGGTATGGCCTTGGGTTCTATTACATNCTGCTGTAGCGGTCCTTTTTG  
CTATGCAAGTGCAGGCGAGGCTTAATT

>T4 Feces D2

GCATAATGGTTTTACCTGGTGTTGTAGACCAAAATAAGATGGCTATGTACACTGCCT  
CTTTAATAGGAGGTATGGCCATGGGTTCTATTACATCTGCTGTAGCGGTCCCTTTTTGC  
TATGCAAGTGCAGGCGAGGCTTAATT

>T5 Effusion D0

CAATGGCATAATGGTGCTACCGGGTGTTGTTGACCAAAACAAGATGGCTATGTACA  
CTGCATCTTTAATAGGAGGTATGGCTYTGGGCTCTATCACTTCTGCTGTAGCTGTCCC  
TTTTGCCATGCAAGTTCAGGCTAGGCTTAATTATGTTGCATTACAACTGATGTGTTA  
CAGGAAAACCAGAAGATACTTGCTAATGCTTTTAATAATGCTATTGGTAATATTACA  
CTAGCGCTTGGAAGGTTTCTAATGCTATTACAACCAATTTCAGCTGGTTTTAATACCA  
TGGCCTCAGCACTGACCAAGATTCAGAGTGTAGTCAATCAACAAGGTGAGGCGTTG  
AGTCAACTTACTAGTCAGYTACAGAAAAATTTCCAAGCTATTAGTAGTTCCATTGCT  
GAAATCTACAATAGACTGGGAAAAGTGGAAGCTGATGCGCAAGTTGACCGCCTCAT  
TACTGGCAGGTTGGCAGCACTTAATGCTTATGTGTCTCAAACCTTTGACTCAGTATGCA  
GAGGTCAAAGCTAGTAGACAACCTGGCAATGGAGAAAGTTAATGAGTGTGTAAAATC  
ACAGTCAGATAGGTATGGTTTCTGCGGGACTCGAGGGA

>T5 Effusion D1

GGCATAATGGTTTTACCTGGTGTTGTTGACCAAAACAAGATGGCTATGTACACTGCA  
TCTTTAATAGGAGGTATGGCTCTGGGCTCTATCACTTCTGCTGTAGCTGTCCCTTTTGC  
CATGCAAGTGCAGGCGAGGCTTAATT

>T5 Effusion D2

TCGGCATAATGGTTTTACCTGGTGTTGTTGACCAAAACAAGATGGCTATGTACACTG  
CATCTTTAATAGGAGGTATGGCTCTGGGCTCTATCACTTCTGCTGTAGCTGTCCCTTTT  
GCCATGCAAGTGCAGGCGAGGCTTAATT

>T5 Feces D1

TCGGGCATAATGGTTTTACCTGGTGTTGTTGACCAAAACAAGATGGCTATGTACACT  
GCATCTTTAATAGGAGGTATGGCTATGGGCTCTATCACTTCTGCTGTAGCTGTCCCTT  
TTGCCATGCAAGTGCAGGCGAGGCTTAATTA

>T5 Feces D2

ATGGTTTTACCTGGTGTTGTTGACCAAAACAAGAATGGCTATGTACACTGCATCTTTA  
ATAGGAGGTATGGCTATGGGCTCTATCACTTCTGCTGTAGCTGTCCCTTTTGCCATGC  
AAGTGCAGGCGAGGCTTAATTAT

>T7 Effusion D0

ACAATGGCATAATGGTTTTACCTGGTGTGTAGATCAAAATAAGATGGCCATGTATA  
CTGCCTCATTAATAGGCGGTATGGCATTGGGTTCTATTACATCTGCTGTAGCTGTTCC  
TTTTGCTATGCAAGTGCAGGCTAGGCTTAATTATGTTGCATTGCAAACCTGACGTTCTA  
CAGGAAAACCAGAAAATACTTGCTAATGCCTTTAATAATGCCATTGGTAACATTACA  
CTAGCGCTTGGAAAAGTTTCTAACGCTATTACAACCTACTTCAGAGGGATTAAACAGT  
ATGGCCTCAGCACTGACTAAGATTCAAAGTGTAGTTAATCAACAAGGTGAAGCGTT  
GAGTCAACTTACTAGCCAGTTACAGAAAACTTCCAGGCTATTAGTAGTTCTATTGC  
TGAAATCTACAATAGACTGGAAAAAGCGGAAGCAGATGCACAAGTTGACCGTCTCA  
TTACTGGTAGATTGGCAGCACTTAATGCCTATGTGTCTCAAACCTTAACTCAGTATGC  
TGAAGTCAAGGCTAGCAGACAACCTTGCAATGGAGAAAGTTAATGAGTGTGTGAAAT  
CACAGTCTGATAGGTATGGTTTCTGCGGGACCTCGAGGGA

>T7 Feces D2

GGCATAATGGTTTTACCTGGTGTGTAGATCAAAATAAGATGGCCAATGTATACTGC  
CTCATTAATAGGCGGTATGGCTATGGGTTCTATTACATCTGCTGTAGCTGTTCCCTTTG  
CTATGCAAGTGCAGGCGAGGCTTAATTAA

>T7 Feces D3

AATGGTTTTACCTGGTGTGTAGATCAAAATAAGATGGCCATGTATACTGCCTCATTT  
AATAGGCGGTATGGCTATGGGTTCTATTACATCTGCTGTAGCTGTTCCCTTTTGCTATG  
CAAGTGCAGGCGAGGCTTAATT

>T8 Effusion D0

CAATGGCATAATGGTTTTACCTGGCGTCGTAGATTATAATAAGATGGCCATGTACAC  
AGCCTCTTTAATAGGAGGTATGGCTTTGGGTTCTATTACATCTGCTGTAGCCGTTCCC  
TTTGCTATGCAAGTGCAGGCTAGGCTTAATTATGTTGCATTGCAAACGGATGTATTAC  
AGGAAAACCAGAAAATACTTGCTAATGCCTTTAATAATGCCATTGGTAATATTACAC  
TAGCACTTGGAAAGGTTTCTAATGCCATTACAACCTATTTAGATGGATTAACTACTAT  
GGCTTCAGCATTAACCTAAGATCCAGAGTGTGGTTAATCAACAGGGTGAAGCGTTGA  
GTCAACTTACCAGTCAGTTACAGAAAACTTCCAGGCTATTAGTAGTTCCATTGCTG  
AAATCTACAATAGATTGGAAAAGGTGGAAGCTGATGCGCAAGTTGACCGTCTCATT  
ACTGGAAGATTGGCAGCACTTAATGCTTATGTATCTCAAACCTTAACTCAGTATGCT  
GAAGTCAAGGCTAGTAGGCAACTGGCAATGGAAAAAGTTAATGAGTGTGTCAAATC  
GCAGTCGGATAGGTATGGTTTCTGCGGGACTCGAGGGA

>T11 Effusion D0

GGCATAATGGTTTTACCTGGCGTTGCAGATGCTAATAAGATGGCCATGTATACTGCT  
TCTCTAATAGGAGGTATGGCCTTTGGCTCTATTACATCTGCTGCGGCTGTTCCCTTTGC  
CATGCAAGTGCAGGCGAGGCTTAATTAA

>T11 Effusion D0 c1

GGCATAATGGTTTTACCTGGCGTTGCAGATGCTAATAAGATGGCCATGTATACTGCT  
TCTCTAATAGGAGGTATGGCCTTTGGCTCTATTACATCTGCTGCGGCTGTTCCCTTTGC  
CATGCAAGTGCAGGCGAGGCTTAATT

>T11 Effusion D0 c2

GGCATAATGGTTTTACCTGGCGTTGCAGATGCTAATAAGATGGCCATGTATACTGCT  
TCTCTAATAGGAGGTATGGCCTTTGGCTCTATTACATCTGCTGCGGCTGTTCCCTTTGC  
CATGCAAGTGCAGGCGAGGCTTAATTA

>T11 Effusion D0 c3

GGCATAATGGTTTTACCTGGCGTTGCAGATGCTAATAAGATGGCCATGTATACTGCT  
TCTCTAATAGGAGGTATGGCCTTTGGCTCTATTACATCTGCTGCGGCTGTTCCCTTTGC  
CATGCAAGTGCAGGCGAGGCTTAATTA

>T11 Effusion D0 c4

GGCATAATGGTTTTACCTGGCGTTGCAGATGCTAATAAGATGGCCATGTATACTGCT  
TCTCTAATAGGAGGTATGGCCTTTGGCTCTATTACATCTGCTGCGGCTGTTCCCTTTGC  
CATGCAAGTGCAGGCGAGGCTTAATA

>T11 Effusion D0 c6

GGCATAATGGTTTTACCTGGCGTTGCAGATGCTAATAAGATGGCCATGTATACTGCT  
TCTCTAATAGGAGGTATGGCCTTTGGCTCTATTACATCTGCTGCGGCTGTTCCCTTTGC  
CATGCAAGTGCAGGCGAGGCTTAATTA

>T11 Effusion D0 c7

GGCATAATGGTTTTACCTGGCGTTGCAGATGCTAATAAGATGGCCATGTATACTGCT  
TCTCTAATAGGAGGTATGGCCTTTGGCTCTATTACATCTGCTGCGGCTGTTCCCTTTGC  
CATGCAAGTGCAGGCGAGGCTTAATT

>T11 Effusion D0 c8

GGCATAATGGTTTTACCTGGCGTTGCAGATGCTAATAAGATGGCCATGTATACTGCT  
TCTCTAATAGGAGGTATGGCCTTTGGCTCTATTACATCTGCTGCGGCTGTTCCCTTTGC  
CATGCAAGTGCAGGCGAGGCTTAATTA

>T11 Effusion D0 c9

GGCATAATGGTTTTACCTGGCGTTGCAGATGCTAATAAGATGGCCATGTATACTGCT  
TCTCTAATAGGAGGTATGGCCTTTGGCTCTATTACATCTGCTGCGGCTGTTCCCTTTGC  
CATGCAAGTGCAGGCGAGGCTTAATTA

>T11 Effusion D0 c10

GGCATAATGGTTTTACCTGGCGTTGCAGATGCTAATAAGATGGCCATGTATACTGCT  
TCTCTAATAGGAGGTATGGCCTTTGGCTCTATTACATCTGCTGCGGCTGTTCCCTTTGC  
CATGCAAGTGCAGGCGAGGCTTAATT

>T11 Effusion D1

ATAATGGTTTTACCTGGCGTTGCAGATGCTAATAAGATGGCCATGTATACTGCTTCTC  
TAATAGGAGGTATGGCCTTTGGCTCTATTACATCTGCTGCGGCTGTTCCCTTTGCCAT  
GCAAGTGCAGGCGAGGCTTAATTAA

>T11 Effusion D1 c1

GGCATAATGGTTTTACCTGGCGTTGCAGATGCTAATAAGATGGCCATGTATACTGCT  
TCTCTAATAGGAGGTATGGCCTTTGGCTCTATTACATCTGCTGCGGCTGTTCCCTTTGC  
CATGCAAGTGCAGGCGAGGCTTAATTA

>T11 Effusion D1 c2

GGCATAATGGTTTTACCTGGCGTTGCAGATGCTAATAAGATGGCCATGTATACTGCT  
TCTCTAATAGGAGGTATGGCCTTTGGCTCTATTACATCTGCTGCGGCTGTTCCCTTTGC  
CGTGCAAGTGCAGGCGAGGCTTAATTA

>T11 Effusion D1 c3

GGCATAATGGTTTTACCTGGCGTTGCAGATGCTAATAAGATGGCCATGTATACTGCT  
TCTCTAATAGGAGGTATGGCCTTTGGCTCTATTACATCTGCTGCGGCTGTTCCCTTTGC  
CATGCAAGTGCAGGCGAGGCTTAATTA

>T11 Effusion D1 c4

GGCATAATGGTTTTACCTGGCGTTGCAGATGCTAATAAGATGGCCATGTATACTGCT  
TCTCTAATAGGAGGTATGGCCTTTGGCTCTATTACATCTGCTGCGGCTGTTCCCTTTGC  
CATGCAAGTGCAGGCGAGGCTTAATTA

>T11 Effusion D1 c5

GGCATAATGGTTTTACCTGGCGTTGCAGATGCTAATAAGATGGCCATGTATACTGCT  
TCTCTAATAGGAGGTATGGCCTTTGGCTCTATTACATCTGCTGCGGCTGTTCCCTTTGC  
CATGCAAGTGCAGGCGAGGCTTAATTA

>T11 Effusion D1 c6

GGCATAATGGTTTTACCTGGCGTTGCAGATGCTAATAAGATGGCCATGTATACTGCT  
TCTCTAATAGGAGGTATGGCCTTTGGCTCTATTACATCTGCTGCGGCTGTTCCCTTTGC  
CATGCAAGTGCAGGCGAGGCTTAATTA

>T11 Effusion D1 c7

GGCATAATGGTTTTACCTGGCGTTGCAGATGCTAATAAGATGGCCATGTATACTGCT  
TCTCTAATAGGAGGTATGGCCTTTGGCTCTATTACATCTGCTGCGGCTGTTCCCTTTGC  
CATGCAAGTGCAGGCGAGGCTTAATTA

>T11 Effusion D1 c8

GGCATAATGGTTTTACCTGGCGTTGCAGATGCTAATAAGATGGCCATGTATACTGCT  
TCTCTAATAGGAGGTATGGCCTTTGGCTCTATTACATCTGCTGCGGCTGTTCCCTTTGC  
CATGCAAGTGCAGGCGAGGCTTAATTA

>T11 Effusion D1 c9

GGCATAATGGTTTTACCTGGCGTTGCAGATGCTAATAAGATGGCCATGTATACTGCT  
TCTCTAATAGGAGGTATGGCCTTTGGCTCTATTACATCTGCTGCGGCTGTTCCCTTTGC  
CATGCAAGTGCAGGCGAGGCTTAATTA

>T11 Effusion D1 c10

GGCATAATGGTTTTACCTGGCGTTGCAGATGCTAATAAGATGGCCATGTATACTGCT  
TCTCTAATAGGAGGTATGGCCTTTGGCTCTATTACATCTGCTGCGGCTGTTCCCTTTGC  
CATGCAAGTGCAGGCGAGGCTTAATTA

>T12 Effusion D0

GGCATAATGGTTTTACCTGGTGTTGTTGATCAAAATAAAATGGCTATGTACACTTCCT  
CTTTAATAGGAGGTATGGCCATGGGTGCCATCACGTCCGCTGTAGCAGTCCCTTTTCG  
CCATGCAAGTGCAGGCGAGGCTTAAT

>T12 Effusion D0 c1

GGCATAATGGTTTTACCTGGTGTTGTTGATCAAAATAAAATGGCTATGTACACTTCCT  
CTTTAATAGGAGGTATGGCCATGGGTGCCATCACGTCCGCTGTAGCAGTCCCTTTTCG  
CCATGCAAGTGCAGGCGAGGCTTAATTA

>T12 Effusion D0 c3

GGCATAATGGTTTTACCTGGTGTTGTTGATCAAAATAAAATGGCTATGTACACTTCCT  
CTTTAATAGGAGGTATGGCCATGGGTGCCATCACGTCCGCTGTAGCAGTCCCTTTTCG  
CCATGCAAGTGCAGGCGAGGCTTAATTA

>T12 Effusion D0 c4

GGCATAATGGTTTTACCTGGTGTTGTTGATCAAAATAAAATGGCTATGTACACTTCCT  
CTTTAATAGGAGGTATGGCCATGGGTGCCATCACGTCCGCTGTAGCAGTCCCTTTTCG  
CCATGCAAGTGCAGGCGAGGCTTAATTA

>T12 Effusion D0 c5

GGCATAATGGTTTTACCTGGTGTTGTTGATCAAAGTAAATGGCTATGTACACTTCCT  
CTTTAATAGGAGGTATGGCCATGGGTGCCATCACGTCCGCTGTAGCAGTCCCTTTTCG  
CCATGCAAGTGCAGGCGAGGCTTAATTA

>T12 Effusion D0 c6

GGCATAATGGTTTTACCTGGTGTTGTTGATCAAAATAAAATGGCTATGTACACTTCCT  
CTTTAATAGGAGGTATGGCCATGGGTGCCATCACGTCCGCTGTAGCAGTCCCTTTTCG  
CCATGCAAGTGCAGGCGAGGCTTAATTA

>T12 Effusion D0 c7

GGCATAATGGTTTTAACCTGGTGTTGTTGATCAAAATAAAATGGCTATGTACACTTCCT  
CTTTAATAGGAGGTATGGCCATGGGTGCCATCACGTCCGCTGTAGCAGTCCCTTTTCG  
CCATGCAAGTGCAGGCGAGGCTTAATTA

>T12 Effusion D0 c8

GGCATAATGGTTTTACCTGGTGTTGTTGATCAAAATAAAATGGCTATGTACACTTCCT  
CTTTAATAGGAGGTATGGCCATGGGTGCCATCACGTCCGCTGTAGCAGTCCCTTTTCG  
CCATGCAAGTGCAGGCGAGGCTTAATTA

>T12 Effusion D0 c9

GGCATAATGGTTTTACCTGGTGTTGTTGATCAAGATAAAATGGCTATGTACACTTCCT  
CTTTAATAGGAGGTATGGCCATGGGTGCCATCACGTCCGCTGTAGCAGTCCCTTTTCG  
CCATGCAAGTGCAGGCGAGGCTTAA

>T12 Effusion D0 c10

GGCATAATGGTTTTACCTGGTGTTGTTGATCAAAATAAAATGGCTATGTACACTTCCT  
CTTTAATAGGAGGTATGGCCATGGGTGCCATCACGTCCGCTGTAGCAGTCCCTTTTCG  
CCATGCAAGTGCAGGCGAGGCTTAATTA

>T14 Blood D0

GCATAATGGTTTTACCGGCGTTGTGGATGCCAATAAGATGGCCATGTACACCGCCTC  
TTTGATAGGAGGTATGGCTATGGGTGCCATTACCTCCGCTGTAGCTGTTTCCTTTTGCT  
ATGCAAGTGCAGGCGAGGCTTAATTA

>T14 Blood D0 c2

GGCATAATGGTTTTACCTGGCGTTGTGGATGCCAATAAGATGGCCATGTACACCGCC  
TCTTTGATAGGAGGTATGGCTATGGGTGCCATTACCTCCGCTGTAGCTGTTTCCTTTTG  
CTATGCAAGTGCAGGCGAGGCTTAATTA

>T14 Blood D0 c3

GGCATAATGGTTTTACCTGGCGTTGTGGATGCCAATAAGATGGCCATGTACACCGCC  
TCTTTGATAGGAGGTATGGCTATGGGTGCCATTACCTCCGCTGTAGCTGTTTCCTTTTG  
CTATGCAAGTGCAGGCGAGGCTTAATTA

>T14 Blood D0 c5

GGCATAATGGTTTTACCTGGCGTTGTGGATGCCAATAAGATGGCCATGTACACCGCC  
TCTTTGATAGGAGGTATGGCTATGGGTGCCATTACCTCCGCTGTAGCTGTTTCCTTTTG  
CTATGCAAGTGCAGGCGAGGCTTAATTT

>T14 Blood D0 c6

GGCATAATGGTTTTACCTGGCGTTGTGGATGCCAATAAGATGGCCATGTACACCGCC  
TCTTTGATAGGAGGTATGGCTATGGGTGCCATTACCTCCGCTGTAGCTGYTCCTTTTG  
CTATGCAAGTGCAGGCGAGGCTTAATTA

>T14 Blood D0 c8

GGCATAATGGTTTTACCTGGCGTTGTGGATGCCAATAAGATGGCCATGTACACCGCC  
TCTTTGATAGGAGGTATGGCTATGGGTGCCATTACCTCCGCTGTAGCTGTTTCCTTTTG  
CTATGCAAGTGCAGGCGAGGCTTAATTT

>T14 Blood D0 c10

GGCATAATGGTTTTACCTGGCGTTGTGGATGCCAATAAGATGGCCATGTACACCGCC  
TCTTTGATAGGAGGTATGGCTATGGGTGCCATTACCTCCGCTGTAGCTGTTTCCTTTTG  
CTATGCAAGTGCAGGCGAGGCTTAATTA

>T14 Effusion D0

CATAATGGTTTTACCGGCGTTGTGGATGCCAATAAGATGGCCATGTACACCGCCTCT  
TTGATAGGAGGTATGGCTATGGGTGCCATTACCTCCGCTGTAGCTGTTTCCTTTTGCTA  
TGCAAGTGCAGGCGAGGCTTAATTAA

>T14 Effusion D0 c1

GGCATAATGGTTTTACCTGGCGTTGTGGATGCCAATAAGATGGCCATGTACACCGCC  
TCTTTGATAGGAGGTATGGCTATGGGTGCCATTACCTCCGCTGTAGCTGTTTCCTTTTG  
CTATGCAAGTGCAGGCGAGGCTTAATTA

>T14 Effusion D0 c2

GGCATAATGGTTTTACCTGGCGTTGTGGATGCCAATAAGATGGCCATGTACACCGCC  
TCTTTGATAGGAGGTATGGCTATGGGTGCCATTACCTCCGCTGTAGCTGTTTCCTTTTG  
CTATGCAAGTGCAGGCGAGGCTTAATTA

>T14 Effusion D0 c3

GGCATAATGGTTTTACCTGGCGTTGTGGATGCCAATAAGATGGCCATGTACACCGCC  
TCTTTGATAGGAGGTATGGCTATGGGTGCCATTACCTCCGCTGTAGCTGTTTCCTTTTG  
CTATGCAAGTGCAGGCGAGGCTTAATT

>T14 Effusion D0 c4

GGCATAATGGTTTTACCTGGCGTTGTGGATGCCAATAAGATGGCCATGTACACCGCC  
TCTTTGATAGGAGGTATGGCTATGGGTGCCATTACCTCCGCTGTAGCTGTTTCCTTTTG  
CTATGCAAGTGCAGGCGAGGCTTAATTA

>T14 Effusion D0 c5

GGCATAATGGTTTTACCTGGCGTTGTGGATGCCAATAAGATGGCCATGTACACCGCC  
TCTTTGATAGGAGGTATGGCTATGGGTGCCATTACCTCCGCTGTAGCTGTTTCCTTTTG  
CTATGCAAGTGCAGGCGAGGCTTAATT

>T14 Effusion D0 c7

GGCATAATGGTTTTACCTGGCGTTGTGGATGCCAATAAGATGGCCATGTACACCGCC  
TCTTTGATAGGAGGTATGGCTATGGGTGCCATTACCTCCGCTGTAGCTGTTCTTTTG  
CTATGCAAGTGCAGGCGAGGCTTAATT

>T14 Effusion D0 c8

GGCATAATGGTTTTACCTGGCGTTGTGGATGCCAATAAGATGGCCATGTACACCGCC  
TCTTTGATAGGAGGTATGGCTATGGGTGCCATTACCTCCGCTGTAGCTGTTCTTTTG  
CTATGCAAGTGCAGGCGAGGCTTAATTA

>T14 Effusion D0 c9

GGCATAATGGTTTTACCTGGCGTTGTGGATGCCAATAAGATGGCCATGTACACCGCC  
TCTTTGATAGGAGGTATGGCTATGGGTGCCATTACCTCCGCTGTAGCTGTTCTTTTG  
CTATGCAAGTGCAGGCGAGGCTTAATTA

>T14 Effusion D0 c10

GGCATAATGGTTTTACCTGGCGTTGTGGATGCCAATAAGATGGCCATGTACACCGCC  
TCTTTGATAGGAGGTATGGCTATGGGTGCCATTACCTCCGCTGTAGCTGTTCTTTTG  
CTATGCAAGTGCAGGCGAGGCTTAATTA

>T14 Effusion D1

GGCATAATGGTTTTACCGGCGTTGTGGATGCCAATAAGATGGCCATGTACACCGCCT  
CTTTGATAGGAGGTATGGCTATGGGTGCCATTACCTCCGCTGTAGCTGTTCTTTTGC  
TATGCAAGTGCAGGCGAGGCTTAATTAA

>T14 Effusion D1 c1

GGCATAATGGTTTTACCTGGCGTTGTGGATGCCAATAAGATGGCCATGTACACCGCC  
TCTTTGATAGGAGGTATGGCTATGGGTGCCATTACCTCCGCTGTAGCTGTTCTTTTG  
CTATGCAAGTGCAGGCGAGGCTTAATTA

>T14 Effusion D1 c2

GGCATAATGGTTTTACCTGGCGTTGTGGATGCCAATAAGATGGCCATGTACACCGCC  
TCTTTGATAGGAGGTATGGCTATGGGTGCCATTACCTCCGCTGTAGCTGTTCTTTTG  
CTATGCAAGTGCAGGCGAGGCTTAATTA

>T14 Effusion D1 c3

GGCATAATGGTTTTACCTGGCGTTGTGGATGCCAATAAGATGGCCATGTACACCGCC  
TCTTTGATAGGAGGTATGGCTATGGGTGCCATTACCTCCGCTGTAGCTGTTCTTTTG  
CTATGCAAGTGCAGGCGAGGCTTAATTA

>T14 Effusion D1 c4

GGCATAATGGTTTTACCTGGCGTTGTGGATGCCAATAAGATGGCCATGTACACCGCC  
TCTTTGATAGGAGGTATGGCTATGGGTGCCATTACCTCCGCTGTAGCTGTTCTTTTG  
CTATGCAAGTGCAGGCGAGGCTTAATTA

>T14 Effusion D1 c5

GGCATAATGGTTTTACCTGGCGTTGTGGATGCCAATAAGATGGCCATGTACACCGCC  
TCTTTGATAGGAGGTATGGCTATGGGTGCCATTACCTCCGCTGTAGCTGTTCTTTTG  
CTATGCAAGTGCAGGCGAGGCTTAATTA

>T14 Effusion D1 c6

GGCATAATGGTTTTACCTGGCGTTGTGGATGCCAATAAGATGGCCATGTACACCGCC  
TCTTTGATAGGAGGTATGGCTATGGGTGCCATTACCTCCGCTGTAGCTGTTCTTTTG  
CTATGCAAGTGCAGGCGAGGCTTAATTA

>T14 Effusion D1 c8

GGCATAATGGTTTTACCTGGCGTTGTGGATGCCAATAAGATGGCCATGTACACCGCC  
TCTTTGATAGGAGGTATGGCTATGGGTGCCATTACCTCCGCTGTAGCTGTTCTTTTG  
CTATGCAAGTGCAGGCGAGGCTTAATTA

>T14 Effusion D1 c9

GGCATAATGGTTTTACCTGGCGTTGTGGATGCCAATAAGATGGCCATGTACACCGCC  
TCTTTGATAGGAGGTATGGCTATGGGTGCCATTACCTCCGCTGTAGCTGTTCTTTTG  
CTATGCAAGTGCAGGCGAGGCTTAATTA

>T14 Effusion D1 c10

GGCATAATGGTTTTACCTGGCGTTGTGGATGCCAATAAGATGGCCATGTACACCGCC  
TCTTTGATAGGAGGTATGGCTATGGGTGCCATTACCTCCGCTGTAGCTGTTCTTTTG  
CTATGCAAGTGCAGGCGAGGCTTAATTA

>T15 Effusion D0

TCGGGCATAATGGTTTTACCTGGCGTCGTAGATGGTAACAAGATGGCCATGTACACA  
GCCTCTTTAATAGGAGGTATGGCTTTGGGTTCTATTACATCTGCTGTAGCCGTTCCCTT  
TGCTATGCAAGTGCAGGCGAGGCTTAATTA

>T15 Feces D0

TCGGCATAATGGTTTTACCTGGCGTCGTAGATGATAACAAGATGGCCATGTACACAG  
CCTCTTTAATAGGAGGTATGGCTATGGGTTCTATTACATCTGCTGTAGCCGTTCCCTT  
GCTATGCAAGTGCAGGCGAGGCTTAATTA

>T16 Feces D0

GCATAATGGTTTTACCTGGTGTGCAGATCAAAATAAGATGGCTATGTACACTGCCT  
CTTTAATAGGAGGTATGGCCATGGGCTCTATCACATTCCGCTGTAGCTGTTCTTTTCG  
CCATGCAAGTGCAGGCGAGGCTTAATTA

>T16 Feces D1

GCATAATGGTTTTACCTGGTGTTGCAGATCAAAATAAGATGGCTATGTACACTGCCT  
CTTTAATAGGAGGTATGGCCATGGGCTCTATCACATCCGCTGTAGCTGTTCCCTTTCGC  
CATGCAAGTGCAGGCGAGGCTWAATTAARR

>T18 Effusion D0

GGCATAATGGTTTTACCTGGTGTTGTAGATTATAACAAAATGGCTATGTACACTGCCT  
CTTTAATAGGCGGTATGGCTTTGGGTTCTATTACGTCTGCAGTAGCTGTCCCTTTTGC  
CATGCAAGTGCAGGCGAGGCTTAATT

>T18 Effusion D1

GCATAATGGTTTTACCTGGTGTTGTAGATTATAACAAAATGGCTATGTACACTGCCTC  
TTTAATAGGCGGTATGGCTTTGGGTTCTATTACGTCTGCAGTAGCTGTCCCTTTTGCCATGCAA  
GTGCAGGCGAGGCTTAATT
